# Supplementary material for: Induction of PARP7 Creates a Vulnerability for Growth Inhibition by RBN2397 in Prostate Cancer Cells
Source: PubMed Central journal article supplement (PMC10108886; doi:10.1158/2767-9764.crc-23-0086), 2023-04-17
Supplement: crc-23-0086-s05.pdf [file crc-23-0086-s05.pdf]

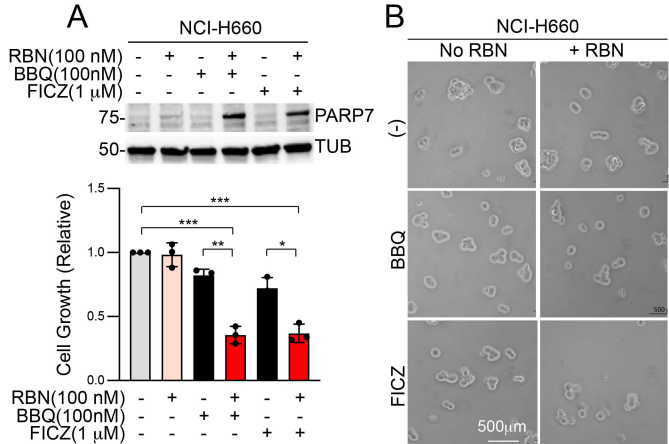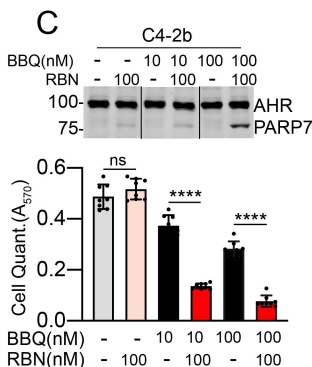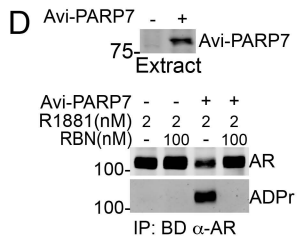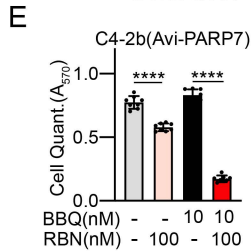

**Supplementary Figure 4. RBN2397 inhibition of prostate cancer cell growth requires PARP7 over-expression.**

(A) Effect of RBN2397 on NCI-H660 cells treated with AHR agonists BBQ or FICZ to induce PARP7. PARP7 levels are shown (upper panel). Each condition reflects five biological replicates. In A, C and E, error bars show the standard deviation, and \*\*\*\*,  $p < 0.0001$ ; \*\*\*,  $p < 0.001$ ; \*\*,  $p < 0.01$ , \*,  $p < 0.05$ ; ns, not significant.

(B) Phase contrast microscopy showing the morphology of cells using the treatments shown in (A).

(C) Effect of RBN2397 on C4-2b cell lines treated with AHR agonists BBQ. In C and E, each condition reflects eight biological replicates.

(D) Avi-tagged PARP7 (Avi-PARP7) over-expression in C4-2b cells (upper panel) characterized by immunoprecipitation, immunoblotting, and detection of AR ADP-ribosylation with FI-Af1521.

(E) RBN2397 inhibits the growth of C4-2b(Avi-PARP7) cells in the absence of AHR agonist BBQ.
