# Supplementary material for: Induction of PARP7 Creates a Vulnerability for Growth Inhibition by RBN2397 in Prostate Cancer Cells
Source: PubMed Central journal article supplement (PMC10108886; doi:10.1158/2767-9764.crc-23-0086), 2023-04-17
Supplement: crc-23-0086-s06.pdf [file crc-23-0086-s06.pdf]

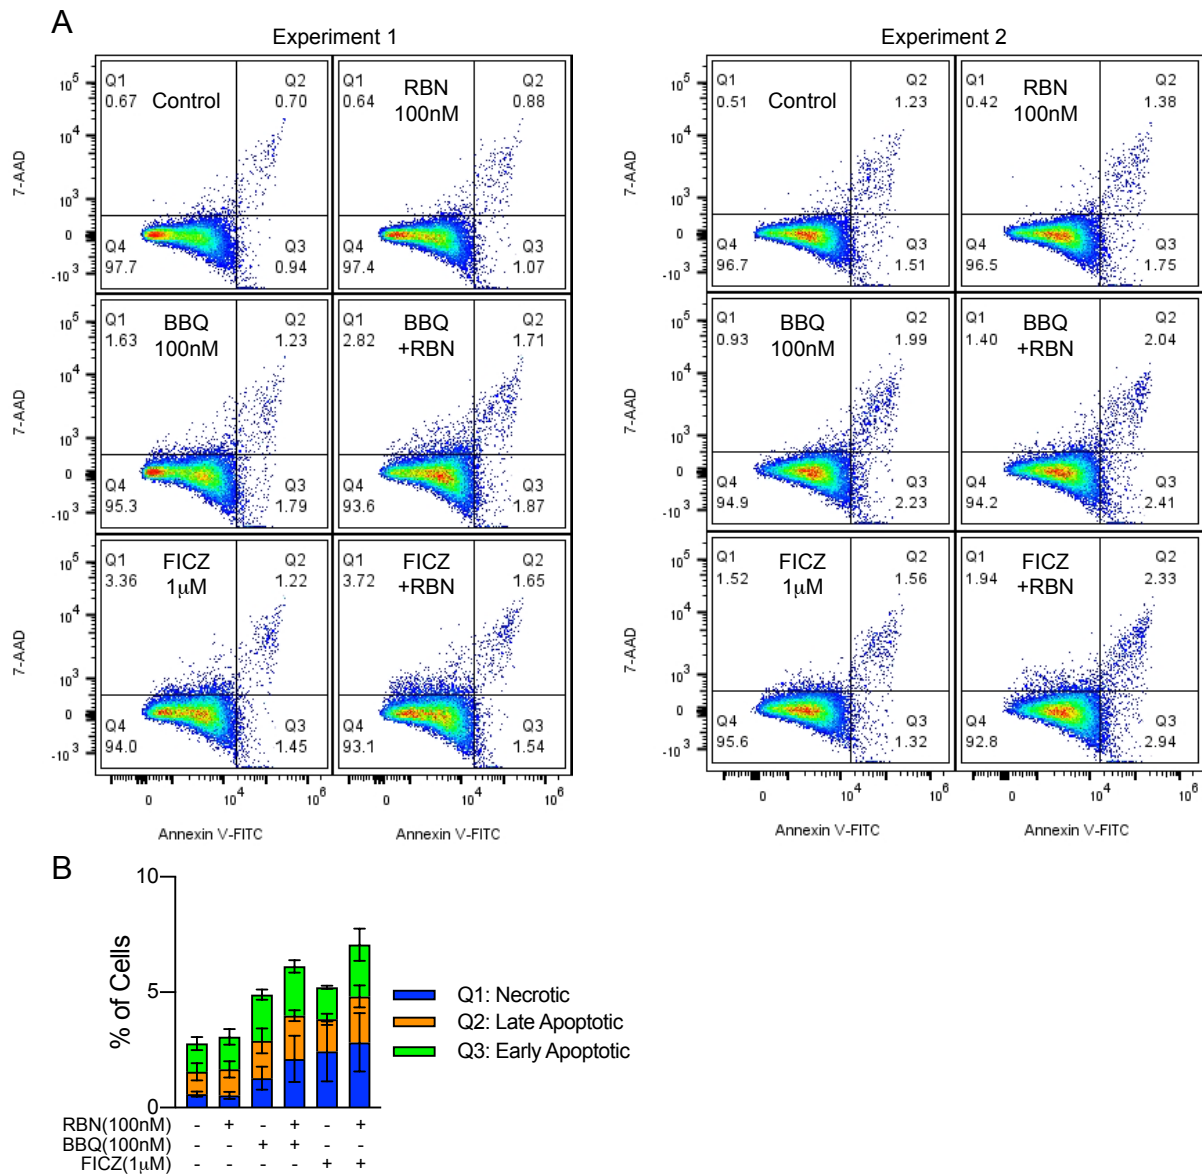

**Supplementary Figure 5. FACS analysis of NCI-H660 cells for detection of necrosis and apoptosis.**

(A) Cells were treated with BBQ, FICZ and RBN for 5 days, stained with Annexin V-FITC and 7-AAD, and examined by flow cytometry.

(B) Percentage of NCI-H660 cells in necrosis, late apoptosis and early apoptosis. Data from two experiments were combined and plotted as the mean and range.
